# Supplementary material for: Site-Selective Superassembly of Biomimetic Nanorobots Enabling DeepPenetration into Tumor with Stiff Stroma
Source: Research Square preprint supplement (doi:10.21203/rs.3.rs-2506896/v1), 2023-01-27
Supplement: Supplementary file 1 [file f55cc812ce2c82d1d9a66c9f.xlsx]

## Sheet: Figure 2
Figure 2e
Body Length
336.74
366.24
362.65
278.73
320.34
318.31
386.19
310.57
379.15
325.26
350.34
353.29
422.64
365.12
365.73
387.98
387.95
379.33
377.26
366.18
380.67
383.11
371.24
373.56
364.25
342.97
370.71
403.26
344.5
383.61
318.63
318.57
322.32
323.52
281.43
305.24
312.43
310.47
278.13
313.24
297.78
320.58
314.93
324.25
312.43
318.38
331.17
361.14
347.44
337.7
345.26
348.78
365.49
374.25
411.4
321.42
383.82
407.08
324.26
325.42
349.17
340.73
356.83
368.45
374.33
363.09
377
403.3
381.87
375.15
403.51
407.27
404.01
389.9
395.78
370.9
378.97
389.76
326.57
337.74
314
321.66
348.63
364.6
352.51
363.86
368.36
348.25
357.9
404.14
308.18
323.77
284.37
331.49
343.18
266.44
293.63
340.61
328.77
329.25
344.16
355.01
342.91
365.04
390.04
385.52
335.47
346.23
318.38
319.68
312.05
333.29
344.05
349.19
294.06
349.87
324.85
364.55
277.89
355.79
332.24
354.59
290.11
355.1
369.72
325.18
356.05
352.68
337.36
359.55
350.62
364.76
367.57
324.26
344.35
301.39
359.97
323.62
371.55
296.27
386.11
386.11
404.7
409.73
361.73
400.66
377.34
405.59
364.84
373.62
361.16
389.69
374.83
395.39
417.9
438.39
444.32
378.48
367.24
369.28
381.24
372.57
410.22
375.25
381.62
410.25
396.94
357.89
359.85
378.04
403.19
392.36
437.33
310.24
325.91
380.8
356.86
346.11
368.14
348.38
342.18
328.04
334.23
361.32
357.57
336.39
349.14
325.49
333.4
384.75
364.14
364.65
374.39
360.03
387.3
324.84
368.47
363.32
354.58
389.76
365.92
370.9
384.5
353.38
365.98
307.89
346.24
335.79
333.82
321.65
381.89
369.56
365.49
392.11
388.57
387.43
381.97
378.27
374.86
417.84
403.94
340.6
392.08
373.38
371.91
392.43
370.44
373.38
371.59
335.64
370.62
386.11
382.61
375.54
384.89
326.96
292.98
324.85
346.08
332.29
290.9
357.9
285.82
321.7
364.51
356.38
360.69
348.55
375.02
344.41
355.95
371.49
390.61
367.35
332.89
353.29
335.41
311.85
314.73
334.8
318.65
362.29
347.21
309.76
303.19
311.12
342.1
315.81
323.97
284.24
290.98
304.78
333.98
296.38
309.25
292.83
287.09
332.93
315.66
298.16
324.26
297.94
330.82
312.83
305.2
321.36
293.11
273.8
308.68
297.45
305.98
319.77
313.49
327.09
330.62
387.53
355.09
343.76
380.34
347.14
345.56
343.16
373.83
387.83
399.45
347.99
400.18

## Sheet: Figure 3h
Figure 3h
Concentration of ligand (mM)	5				Concentration of ligand (mM)	15				Concentration of ligand (mM)	25
	Hollow tail diameter (nm)	Spike length (nm)				Hollow tail diameter (nm)	Spike length (nm)				Hollow tail diameter (nm)	Spike length (nm)
Data1	237.26	16.65			Data1	120.98	86.11			Data1	103.33	98.62
Data2	249.95	12			Data2	115.92	61.14			Data2	94.77	91.97
Data3	244.79	12.71			Data3	113.93	72.3			Data3	94.78	91.97
Data4	242.84	12.81			Data4	112.54	62.07			Data4	98.3	99.77
Data5	239.78	11.63			Data5	122.23	58.58			Data5	97.11	98.62
Data6	242.78	10.84			Data6	112.7	53.76			Data6	95.94	96.98
Data7	240.77	11.63			Data7	127.39	74.14			Data7	99.48	93.75
Data8	251.79	10.53			Data8	124.36	72.3			Data8	100.19	96.28
Data9	243.88	12.63			Data9	124.37	62.3			Data9	101.76	97.22
Data10	251.92	11.34			Data10	112.95	54.63			Data10	102.06	97.76
Data11	250.86	11.63			Data11	113.85	76.7			Data11	98.99	99.77
Data12	248.89	11.91			Data12	119.05	56.7			Data12	99.23	97.22
Data13	247.84	12.27			Data13	110.35	59.87			Data13	100.79	98.81
Data14	243.77	22.32			Data14	112.22	60.24			Data14	102.35	100.41
Data15	241.8	13.39			Data15	109.89	62.53			Data15	104.91	100.25
Data16	240.78	12			Data16	112.01	64.2			Data16	105.48	99.5
Data17	238.79	11.63			Data17	111.96	64.4			Data17	101.76	97.89
Data18	243.01	13.31			Data18	112.87	60.96			Data18	99.61	93.75
Data19	249.96	10.42			Data19	111.67	70.87			Data19	97.35	97.63
Data20	246.05	10.73			Data20	116.32	55.68			Data20	95.58	99.41
Data21	228.8	10.84			Data21	115.09	67.33			Data21	98.92	95.36
Data22	235.8	12.28			Data22	116.57	63.47			Data22	102.2	93.52
Data23	241.8	13.72			Data23	110.17	60.71			Data23	95.58	94.06
Data24	235.79	11.63			Data24	115.18	60.71			Data24	93.57	93.09
Data25	231.82	12			Data25	114.87	60.19			Data25	103.33	87.12
Data26	231.79	12.63			Data26	112.08	86.83			Data26	103.91	90.33
Data27	231.82	12.81			Data27	113.12	55.24			Data27	106.76	91.97
Data28	201.33	14.13			Data28	109.08	62.53			Data28	104.36	95.27
Data29	205.67	12.28			Data29	109.81	57.55			Data29	104.91	92.78
Data30	243.84	14.97			Data30	111.86	51.45			Data30	106.49	96.11
Data31	252.49	13.4			Data31	112.75	63.08			Data31	104.52	97.89
Data32	245.89	14.89			Data32	112.75	52.63			Data32	89.91	98.19
Data33	236.8	13.31			Data33	108.75	83.63			Data33	103.91	94.47
Data34	240.3	16.03			Data34	107.42	75.22			Data34	102.73	87.09
Data35	238.94	14.66			Data35	107.78	69.35			Data35	104.36	90.55
Data36	236.25	16.97			Data36	116.42	67.78			Data36	104.02	88.96
Data37	234.93	14.88			Data37	121.5	67.23			Data37	104.94	91.23
Data38	240.72	14.89			Data38	114.77	68.87			Data38	105.8	94.47
Data39	246.09	15.33			Data39	111.86	67.23			Data39	97.53	92.85
Data40	243.84	14.97			Data40	130.85	68.62			Data40	98.5	91.51
Data41	234.93	12.28			Data41	129.09	67.14			Data41	97.53	94.06
Data42	231.76	14.88			Data42	117.73	67.51			Data42	97.44	92.85
Data43	246.83	14.66			Data43	109.31	78.67			Data43	96.91	87.09
Data44	246.6	15.55			Data44	109.31	78.62			Data44	99.03	90.33
Data45	248.71	15.54			Data45	117.14	67.09			Data45	95.86	89.61
Data46	241.63	15.55			Data46	114.57	77.35			Data46	92.24	93.75
Data47	239.68	16.1			Data47	117.73	55.62			Data47	94.8	93.75
Data48	246.62	10.74			Data48	115.25	52.69			Data48	96.4	91.97
Data49	240.42	13.73			Data49	116.41	67.41			Data49	102.82	95.27
Data50	243.11	14.04			Data50	119.84	79.72			Data50	98.5	99.5
Average	240.45	13.4414			Average	115.132	65.819			Average	100.031	94.6516
STDEV	9.6034	2.17817			STDEV	5.39218	8.88401			STDEV	4.07624	6.64809

## Sheet: Figure 3i
Figure 3i
Growth time (h)	0				Growth time (h)	2				Growth time (h)	4				Growth time (h)	6				Growth time (h)	12				Growth time (h)	24
Concentration of ligand (mM)	5	15	25		Concentration of ligand (mM)	5	15	25		Concentration of ligand (mM)	5	15	25		Concentration of ligand (mM)	5	15	25		Concentration of ligand (mM)	5	15	25		Concentration of ligand (mM)	5	15	25
Data1	0	0	0		Data1	0	19.59	52.8		Data1	28.82	70.43	126.27		Data1	70.77	108.98	197.59		Data1	115.79	171.2	273.96		Data1	223.72	290.8	500.98
Data2	0	0	0		Data2	0	20.61	47.08		Data2	24.08	76.41	105.05		Data2	72.81	111.34	160.97		Data2	117.24	211.67	267.4		Data2	200.95	285.4	496.59
Data3	0	0	0		Data3	0	18.88	48.24		Data3	30.95	68.97	108.89		Data3	77.15	139.18	176.26		Data3	138.73	164.67	235.69		Data3	243.66	319.12	493.37
Data4	0	0	0		Data4	0	20.51	47.49		Data4	29.62	81.45	120.55		Data4	97.26	129.13	149.83		Data4	133.68	173.3	311.81		Data4	213.69	321.51	545.96
Data5	0	0	0		Data5	0	20.21	49.38		Data5	34.71	92.4	100.02		Data5	90.86	104.5	147.94		Data5	135.08	182.96	326.82		Data5	208.65	315.44	501.49
Data6	0	0	0		Data6	0	20	49.55		Data6	29.28	93.94	133.29		Data6	91.47	101.73	174.53		Data6	149.31	185.31	254.73		Data6	220.12	283.59	525.02
Data7	0	0	0		Data7	0	20.72	51.07		Data7	55.59	75.52	116.9		Data7	74.99	136.27	167.03		Data7	122.12	182.83	310.23		Data7	233.67	274.91	481.75
Data8	0	0	0		Data8	0	21.44	51.4		Data8	38.19	71.16	135.24		Data8	76.4	131.52	177.03		Data8	140.34	211.2	312.25		Data8	233.69	340.74	549.65
Data9	0	0	0		Data9	0	18.98	49.57		Data9	44.26	90.96	130.3		Data9	72.19	138.96	197.17		Data9	129.59	176.93	243.93		Data9	181.2	335.36	545.89
Data10	0	0	0		Data10	0	19.4	51.42		Data10	38.37	85.55	125.96		Data10	83	148.96	157.98		Data10	122.05	158.87	268.9		Data10	199.66	296.48	509.56
Average	0	0	0		Average	0	20.034	49.8		Average	35.387	80.679	120.247		Average	80.69	125.057	170.633		Average	130.393	181.894	280.572		Average	215.901	306.335	515.026
STDEV	0	0	0		STDEV	0	0.8219	1.8636		STDEV	9.22147	9.55016	12.2258		STDEV	9.40281	16.8706	17.4256		STDEV	10.9748	17.6345	32.2767		STDEV	18.9462	23.0564	24.7986

## Sheet: Figure 4d
Figure 4d
time (h)	0				time (h)	0.25				time (h)	0.5
	Irradiation (-)	0.3 W⸱cm-2	1 W⸱cm-2			Irradiation (-)	0.3 W⸱cm-2	1 W⸱cm-2			Irradiation (-)	0.3 W⸱cm-2	1 W⸱cm-2
Data1	0	0	0		Data1	1.4	2.8	6.8		Data1	4.2	5.6	22.2
Data2	0	0	0		Data2	2.6	5.1	6.1		Data2	3.9	8.1	22
Data3	0	0	0		Data3	1.5	2.7	12.5		Data3	1.8	4.7	30.8
Average	0	0	0		Average	1.83333	3.53333	8.46667		Average	3.3	6.13333	25
STDEV	0	0	0		STDEV	0.66583	1.35769	3.51046		STDEV	1.30767	1.76163	5.02394
time (h)	1				time (h)	2				time (h)	4
	Irradiation (-)	0.3 W⸱cm-2	1 W⸱cm-2			Irradiation (-)	0.3 W⸱cm-2	1 W⸱cm-2			Irradiation (-)	0.3 W⸱cm-2	1 W⸱cm-2
Data1	2.2	4.8	41.2		Data1	5.4	4.9	45.9		Data1	4.4	4.8	56.7
Data2	4.9	9.3	39		Data2	2.1	9.7	55		Data2	5.2	10	57
Data3	3.8	5.9	48.8		Data3	4	5.9	56.8		Data3	2.9	5.9	69
Average	3.63333	6.66667	43		Average	3.83333	6.83333	52.5667		Average	4.16667	6.9	60.9
STDEV	1.35769	2.34592	5.14198		STDEV	1.6563	2.53246	5.84323		STDEV	1.16762	2.74044	7.01641
time (h)	8
	Irradiation (-)	0.3 W⸱cm-2	1 W⸱cm-2
Data1	4.6	4.5	61.7
Data2	7.2	6	62.3
Data3	4	10.5	75
Average	5.26667	7	66.3333
STDEV	1.70098	3.1225	7.51155

## Sheet: Figure 4f
Figure 4f
power				diffusion coefficient
	data1	data2	data3	data4	data5	data6	data7	data8	data9	data10
0	0.79	0.75	0.81	0.8	0.77	0.85	0.84	0.9	0.91	0.87
0.5	2.95	2.44	3.2	3.62	3.24	2.98	2.79	3.34	3.3	2.94
1	3.55	3.96	3.44	4.34	4.29	4.318	5.23	4.5	5.13	4.25
1.5	4.25	4.89	5.3	5.22	5.1	5.3	4.98	5.5	5.27	5.39
2	5.5	5.7	6.1	6.3	5.4	5.4	6.5	5.3	5.2	5.01

## Sheet: Figure 5
Figure 5b
×104	Spike+NIR			Spike			No spike
0min	0	0	0	0	0	0	0	0	0
5min	2.0884	1.9044	1.9948	1.1285	0.7733	0.7269	0.4784	0.4565	0.4347
10min	3.4521	3.7748	3.6256	1.4405	1.7014	1.5926	0.6497	0.6135	0.5459
15min	5.5209	5.3488	5.4325	1.9964	2.446	2.7833	0.9615	0.9027	0.8482
20min	7.0232	7.8254	7.406	3.7254	3.6224	3.5526	1.2806	1.0613	0.9319
30min	8.0795	8.3249	8.3896	5.3406	5.0491	4.7967	1.3744	1.2052	1.1472
Figure 5c
×104	Spike+NIR			Spike			No spike
0min	0	0	0	0	0	0	0	0	0
5min	8.5245	9.3806	5.2437	2.57	3.433	2.2298	0.6711	1.0682	0.9141
10min	11.0539	14.3844	12.2966	4.6769	5.7609	5.8891	1.4716	1.2122	1.7992
15min	17.5642	16.9333	15.7767	9.9037	8.8904	7.1382	1.797	2.048	2.5112
20min	17.623	20.835	19.9786	10.0308	12.4388	11.1842	3.5485	2.7361	3.1034
30min	18.5738	22.0226	22.9864	13.7043	14.5121	12.1975	5.5924	5.1567	6.071
Figure 5d
×104	Spike+NIR			Spike			No spike
0min	0	0	0	0	0	0	0	0	0
5min	4.6973	5.4079	6.2135	3.4	3.0323	2.7019	0.9858	1.5294	0.6497
10min	11.9049	10.9655	9.6747	6.9724	6.2037	5.5183	2.0671	2.5444	1.672
15min	15.639	15.0586	14.5063	9.5631	8.2802	10.2632	2.7318	3.004	3.3088
20min	18.3095	17.5892	19.0614	12.5756	11.7488	10.9746	4.5837	4.17	3.8125
30min	24.4669	20.8105	21.5028	15.5934	13.7927	12.6769	5.4815	5.0328	5.9797
Figure 5e
×104	Spike+NIR			Spike			No spike
0min	0	0	0	0	0	0	0	0	0
5min	4.7792	3.9992	3.5347	0.8057	0.8802	0.8407	0.7739	0.6511	0.5736
10min	6.2873	7.3501	8.1532	2.9033	2.6702	2.562	1.3823	1.5499	1.462
15min	8.4162	9.5274	9.1474	4.0592	5.0846	4.926	1.9904	2.1197	2.0532
20min	10.0902	10.7857	11.1557	5.9148	7.0577	6.6502	2.7962	2.948	2.5244
30min	13.3125	13.7543	12.8949	8.836	7.6517	9.1394	3.1374	3.2573	3.015
Figure 5f
MOD	No Spiky			Spiky			Spiky+NIR
Layer 1	42.674	49.093	51.381	58.623	60.394	68.732	85.923	99.435	90.394
Layer 2	43.457	54.958	47.472	69.345	70.272	69.19	100.835	110.456	120.843
Layer 3	44.385	52.778	49.351	84.146	94.632	85.889	141.391	139.319	150.606

## Sheet: Figure 6
Figure 6e
Rigion of interst(104)	Saline					DOX					Laser					UHHTN					UHHTN+Laser					UHHTN/DOX					UHHTN/DOX+Laser
0	3.3402	3.4696	3.3244	3.3036	3.5294	3.6559	3.3996	3.1042	3.9098	3.908	3.2037	3.2176	3.8917	3.2109	3.7726	3.1169	3.7911	3.3301	3.3194	3.5723	2.879	3.281	3.1763	3.3166	3.1575	2.5736	3.3546	2.9172	3.2788	3.3586	3.6355	3.7448	3.5903	3.9239	3.4838
4	4.2139	4.3364	4.5916	4.4652	4.1493	3.3066	3.306	3.0081	3.774	3.794	4.0188	4.1652	3.9524	3.7425	3.8124	3.9266	4.0662	3.7066	3.5243	3.8721	2.7246	2.9193	3.0473	3.0918	2.7089	2.8482	3.6452	3.2428	3.2227	3.6603	2.7114	2.9151	2.9357	3.1764	2.694
8	5.3565	5.6498	5.2979	5.1834	5.5918	3.251	3.2777	2.9835	3.3163	3.5642	4.4683	4.4046	4.8063	4.4332	4.9068	4.9347	4.5885	4.1665	4.8185	4.6701	2.5003	2.7233	2.9645	2.6815	2.682	3.6498	3.9595	3.6018	3.9561	3.9352	2.5926	2.3001	2.7227	2.6026	2.4897
12	6.0754	5.9182	5.8753	6.1737	6.1602	3.1928	3.1981	2.8984	3.4163	3.4893	5.2506	5.1007	5.5071	5.7277	5.7976	5.6456	5.5102	5.1284	5.74	5.1771	2.4963	2.6583	2.8792	2.547	2.598	4.9677	4.3951	4.4409	4.2553	4.8052	2.1158	2.1597	2.3391	2.2815	2.0658
16	7.1212	7.1666	6.8802	7.3844	7.3685	3.1859	3.0298	2.7361	3.3126	3.2506	5.8201	5.3027	6.231	6.6721	6.3474	6.3427	6.1197	6.3568	6.6312	6.3043	2.2584	2.489	2.4164	2.4918	2.334	5.4211	5.773	5.9434	5.2499	5.5678	1.5755	1.6796	1.5138	1.3229	1.5063
20	8.0426	7.8926	8.2596	7.8741	7.9152	2.8128	3.0472	2.5521	3.2616	3.1591	7.1763	7.465	7.184	7.3132	7.3961	7.4175	7.5791	7.6673	7.9296	7.1356	1.957	2.3075	2.3445	1.7048	2.0543	5.8388	6.2967	6.4782	6.8662	6.9144	1.0214	1.3705	1.2065	1.0176	1.1012
Figure 6f
Tumor volume(cm3)
Saline	DOX	Laser	UHHTN	UHHTN+Laser	UHHTN/DOX	UHHTN/DOX+Laser
0.19	0.11	0.18	0.15	0.07	0.16	0.02
0.18	0.12	0.16	0.16	0.1	0.14	0.01
0.2	0.08	0.17	0.18	0.08	0.18	0.03
0.16	0.1	0.16	0.19	0.11	0.15	0.01
0.17	0.09	0.15	0.15	0.1	0.14	0.04
Figure 6g
Tumor weight(g)
Saline	DOX	Laser	UHHTN	UHHTN+Laser	UHHTN/DOX	UHHTN/DOX+Laser
0.15	0.0975	0.153	0.1275	0.06	0.11	0.017
0.153	0.1	0.13	0.14	0.1	0.12	0.02
0.17	0.07	0.1445	0.153	0.08	0.153	0.0255
0.136	0.09	0.13	0.1615	0.1	0.12	0.02
0.14	0.08	0.12	0.14	0.1	0.11	0.05
Figure 6k
BMD(g/cm3)
Saline	DOX	Laser	UHHTN	UHHTN+Laser	UHHTN/DOX	UHHTN/DOX+Laser
0.142	0.198	0.152	0.134	0.285	0.129	0.324
0.129	0.207	0.171	0.165	0.242	0.126	0.381
0.137	0.184	0.143	0.145	0.263	0.185	0.395
0.178	0.203	0.113	0.182	0.259	0.164	0.347
0.156	0.187	0.126	0.113	0.278	0.134	0.363
Figure 6k
BV/TV(%)
Saline	DOX	Laser	UHHTN	UHHTN+Laser	UHHTN/DOX	UHHTN/DOX+Laser
71.87	77.13	72.84	70.2	87.37	69.23	88.85
69.23	80.23	73.12	73.37	84.14	69.12	91.12
70.43	74.01	71.88	71.98	86.74	74.1	92.13
73.32	80.17	67.35	73.91	85.23	73.35	89.56
72.98	74.15	69.16	67.35	86.97	70.2	89.99

## Sheet: Figure 7
Figure 7d
Tunel(MOD)
Saline	DOX	Laser	UHHTN	UHHTN+Laser	UHHTN/DOX	UHHTN/DOX+Laser
124.579	172.216	104.443	140.365	223.394	144.326	250.943
103.149	174.349	120.48	118.129	219.483	105.394	269.294
130.501	188.836	119.348	100.561	229.498	115.983	255.838
Figure 7e
MOD	Saline			DOX			Laser			UHHTN			UHHTN+Laser			UHHTN/DOX			UHHTN/DOX+Laser
α-SMA	248.814	229.864	234.672	196.693	220.536	216.74	241.306	216.548	208.126	230.128	207.592	187.922	20.092	28.398	30.42	208.056	229.406	224.918	38.669	43.193	20.636
CD31	229.351	222.904	234.618	231.252	228.916	238.974	202.758	224.389	227.779	225.589	222.264	228.958	109.298	140.652	123.113	247.176	243.659	231.258	111.298	119.942	128.412
F4/80	231.889	243.502	245.507	252.079	245.885	243.878	252.385	247.332	251.114	220.46	226.14	226.886	102.705	96.042	97.102	221.096	221.887	225.172	107.621	95.422	102.227
Collagen I	198.749	159.231	180.152	198.597	191.17	185.009	174.41	190.25	166.447	165.56	178.838	192.604	68.606	35.596	53.817	161.419	166.814	173.122	57.615	57.23	18.605
Fibronectin	231.676	230.918	236.183	244.42	228.483	230.871	225.595	221.677	235.301	223.965	222.75	225.812	115.496	154.294	141.843	230.274	237.14	242.831	130.713	145.827	139.283

## Sheet: Supplementary Figure 4
Supplementary Figure 4
Diameter (nm)
287.34
289.32
278.03
312.34
323.32
321.21
297.1
289
290.69
260.93
299.35
285.45
280.38
218.09
272.3
266.8
240.65
258.37
203.81
209.7
240.36
260.6
235.16
243.77
198.34
201.66
238.49
238.61
253.75
309.56
279.05
285.84
289.51
284.61
276.79
264.14
266.92
259.61
258.51
259.86
195.74
238.43
237.4
243.56
248.38
242.51
241.66
240.44
229.78
225.4
226.62
233.9
227.4
228.82
228.45
227.69
250.98
260.45
256.32
267.89
268.87
278.98
287.87
267.87
290.65
292.54
290.9
278.09
289.03
298.04
340.98
342.12
348.23
332.12
332.42
297.34
269.32
288.03
352.34
333.32
351.21
297.1
289
290.69
260.93
299.35
285.45
280.38
218.09
272.3
266.8
240.65
258.37
203.81
209.7
240.36
260.6
235.16
243.77
198.34
201.66
238.49
238.61
253.75
309.56
279.05
285.84
289.51
284.61
276.79
264.14
266.92
259.61
258.51
259.86
195.74
238.43
237.4
243.56
248.38
242.51
241.66
240.44
229.78
225.4
226.62
233.9
227.4
228.82
228.45
227.69
250.98
260.45
256.32
267.89
268.87
278.98
287.87
267.87
290.65
292.54
290.9
288.09
299.03
289.84
320.98
312.12
328.83
332.62
322.42

## Sheet: Supplementary Figure 5
Supplementary Figure 5
Thickness in head (nm)		Thickness in tail (nm)
a		b
4.98		12.98
4.7		9.81
5.1		10.93
4.81		11.22
6.53		11.09
7.64		10.4
3.57		2.02
4.38		11.89
4.38		11.52
5.42		10.15
6.39		9.4
7.1		8.57
5.51		8.36
6.45		8.41
5.2		8.28
6.64		8.84
3.88		9.11
4.83		7.28
6.3		8.41
6.93		10.66
4.11		8.41
5.12		8.28
5.96		10.41
6.12		7.28
6.63		9.27
7.15		11.3
5.61		11.08
5.61		12.63
5.32		9.22
5.81		7.09
4.83		8.33
4.56		10.41
5.2		9.65
6.38		8.94
6.16		9.11
5.32		9.04
5.2		9.11
5.81		9.11
6.53		8.94
6.22		8.15
5.63		8.22
5.81		7.91
5.1		7.23
6.45		8.57
4.56		10.23
6.45		8.82
6.84		12.22
6.93		10.62
8.91		10.51
8.44		10.62
5.96		10.1
6.93		6.57
6.93		5.05
6.22		9.81
5.42		8.1
5.81		10.17
7.08		10.65
7.1		8.6
6.45		8.69
6.64		8.14
7.15		8.28
7.64		9.31
6.64		12.14
6.93		8.94
6.64		9.31
5.81		7.73
6.84		11.16
4.38		8.59
6.16		8.82
5.51		9.81
6.16		11.11
5.77		10.16
8.8		8.47
9.9		11.09
7.58		8.82
4.59		9.1
6.14		10.11
7.65		6.59
6.63		7.58
7.8		8.6
5.12		7.64
6.2		10.21
7.21		7.09
6.45		10.7
6.63		9.75
7.13		11.39
5.1		7.99
5.63		9.53
7.79		9.04
6.14		9.31
6.64		7.58
9.74		8.1
7.58		8.6
7.3		9.15
8.9		7.73
9.89		6.87
8.06		9.44
6.39		9.53
7.96		8.69
7.58		9.27
6.22		7.18
6.16		9.7
7.76		10.23
7.35		9.65
5.94		7.09
7.1		8.22
9.12		9.31
8.23		6.78
6.93		6.87
6.64		8.28
6.7		10.03
5.2		9.4
6.64		8.82
9.89		7.09
6.62		11.08
5.61		12.38
6.2		14.79
8.54		7.84
6.3		8.95
6.64		8.65
4.7		11.35
7.71		6.14
5.61		6.1
6.93		7.84
8.71		12.47
6.64		9.04
7.24		7.46
7.14		9.29
5.12		8.95
7.14		7.07
9.02		9.11
6.22		8.22
6.64		8.99
7.58		8.15
6.93		7.91
6.84		8.33
6.7		7.02
6.45		7.46
6.93		8.63
6.93		9.81
6.49		9.58
6.86		7.58
5.81		9.29
3.88		8.15
7.21		7.51
7.24		7.51
7.52		7.99
7.58		11.12
6.64		9.11
6.64		7.99
6.14		8.41
8.77		9.72
6.64		13.17
5.42		8.47
6.22		12.67
7.08		8.72
9.3		8.22
6.93		9.81
6.22		8.16
8.9		9.11
8.77		9.95
8.22		10.23
7.98		9.72
8.06		7.36
6.84		9.11
4.83		9.72
6.45		8.82
6.62		7.23
6.62		7.69
5.49		7.69
5.7		10.62
5.32		7.99
5.1		9.29
7.76		7.46
8.3		6.87
6.14		8.63
7.76		8.84
7.3		7.91
6.62		9.27
6.22		9.44
7.42		9.11
6.3		9.58
7.3		10.16
7.42		8.47
8.06		9.58
7.3		9.71
6.64		11.29
5.94		10.11
8.65		8.22
7.35		9.1
4.7		7.14
7.42		8.84
7.35		7.02
7.35		10.85
7.08		8.84
8.65		8.41
8.06		8.63
6.64		9.95
5.77		9.7
6.64		10.4
7.24		9.95
4.83		10.03
6.84		8.84
9.19		8.16
7.21		7.58
7.1		9.11
9.12		6.87
8.23		8.14
7.8		8.22
7.76		7.89
7.91		9.76
6.93		5.37
6.84		8.28
7.08		7.23
6.49		8.72
6.38		8.33
5.81		9.1
7.3		7.64
6.45		8.82
8.17		8.22
7.42		9.49
6.62		7.91
6.93		9.96
6.86		9.53
5.94		8.47
6.16		7.99
8.22		13.67
8.06		9.49
7.64		9.1
7.15		6.08
7.8		12.13
7.76		11.09
7.71		7.84
7.42		10.62
7.1		9.76
7.21		9.58
7.15		10.23
8.3		9.29
6.2		10.1
8.22		9.4
7.78		8.41
8.44		9.95
8.44		8.41
9.12		9.96
7.21		11.18
8.68		10.72
9.4		9.1
6.49		7.99
7.21		10.17
6.65		9.15
6.93		7.84

[truncated: 17 more sheets: Supplementary Figure 20, Supplementary Figure 21-22 , Supplementary Figure 24, Supplementary Figure 36, Supplementary Figure 37, Supplementary Figure 38, Supplementary Figure 39, Supplementary Figure 44, Supplementary Figure 45, Supplementary Figure 46, Supplementary Figure 47, Supplementary Figure 48, Supplementary Figure 50, Supplementary Figure 56, Supplementary Figure 57, Supplementary Figure 59, Supplementary Figure 60]
